# Supplementary material
Source: PubMed Central journal article supplement (PMC7250139)
Supplement: NIHMS1587474-supplement-Supplemental_Material.pdf [file NIHMS1587474-supplement-Supplemental_Material.pdf]

## SUPPLEMENTAL MATERIAL

### Supplemental Table I Comparison of changes in major inflammatory cells in VAT and SAT

| Inflammatory cells     | VAT                                                                                                                        | SAT                                                                      | Ref.      |
|------------------------|----------------------------------------------------------------------------------------------------------------------------|--------------------------------------------------------------------------|-----------|
| <b>Macrophages</b>     | increased in obesity and positively correlated with body mass (M)                                                          | increased in obesity and positively correlated with body mass (M,H)      | 1         |
|                        | increased in obesity (M)                                                                                                   | N/A                                                                      | 2         |
| CD11c+                 | increased in obesity (M)                                                                                                   | N/A                                                                      | 3,4       |
| MMe                    | increased in obesity (M, H)                                                                                                | increased in obesity (H)                                                 | 5         |
| CD9+Trem2+             | increased in obesity (M, H)                                                                                                | N/A                                                                      | 6,7       |
| CD11c+CD206+           | increased in obesity but lower than in SAT (H)                                                                             | increased in obesity and higher than in VAT (H)                          | 8         |
| <b>T cells</b>         | increased in obesity (M)                                                                                                   | N/A                                                                      | 9         |
|                        | higher than in SAT in obesity (H)                                                                                          | lower than in VAT in obesity (H)                                         | 10        |
| $\alpha\beta$ T cells  | increased in obesity (M)                                                                                                   | N/A                                                                      | 11        |
| CD8+                   | increased (M) and higher than in SAT (H) in obesity                                                                        | no change (M) or increased but lower than in VAT (H) in obesity          | 12-14     |
| CD4+                   | increased in obesity (M)                                                                                                   | increased in obesity (M)                                                 | 11,15     |
| Th1                    | increased (M) and higher than in SAT (M, H) in obesity                                                                     | increased (M) but lower than in VAT (M, H) in obesity                    | 11,13, 15 |
| Th17                   | no change in obesity (M)                                                                                                   | increased (M, H) but lower than in VAT (H) in obesity                    | 13,15, 16 |
| Treg                   | enriched and higher than in SAT in leans (M), reduced in obesity (M, H)                                                    | lower than in VAT in leans (M), no change in obesity (M)                 | 14,15, 17 |
| Th2                    | lower than in SAT in obesity (H)                                                                                           | higher than in VAT in obesity (H)                                        | 13        |
| $\gamma\delta$ T cells | reside in leans and increased in obesity or aging (M, H)                                                                   | reside in leans and increased with aging (M)                             | 18,19     |
| <b>B cells</b>         | increased in obesity (M)                                                                                                   | N/A                                                                      | 20        |
|                        | present in obesity (H)                                                                                                     | present in obesity (H)                                                   | 10,21     |
| B2                     | increased in obesity (M)                                                                                                   | N/A                                                                      | 22,23     |
| B1                     | decreased in obesity (M)                                                                                                   | N/A                                                                      | 22,23     |
|                        | present in obesity (H)                                                                                                     | rare in obesity (H)                                                      | 24        |
| Breg                   | reduced and likely lower than in SAT in obesity (M)                                                                        | reduced and likely higher than in VAT in obesity (M)                     | 25        |
| <b>Neutrophils</b>     | increased in obesity (M)                                                                                                   | no increase in obesity (M)                                               | 26-29     |
|                        | present in obesity (H)                                                                                                     | present in obesity (H)                                                   | 10        |
| <b>Eosinophils</b>     | enriched, likely more than in SAT, in leans (M), reduced in obesity (M)                                                    | enriched, likely lower than in VAT, in leans (M), reduced in obesity (M) | 30,31     |
| <b>Mast cells</b>      | increased in obesity (M, H)                                                                                                | increased in obesity (H)                                                 | 32-34     |
| <b>ILCs</b>            |                                                                                                                            |                                                                          |           |
| NKs                    | increased in obesity (M)                                                                                                   | no change in obesity (M)                                                 | 35        |
|                        | increased in obesity (M), similar frequency to SAT in leans (M)                                                            | similar frequency to VAT in leans (M)                                    | 36        |
| ILC1                   | slightly increased in obesity (M)                                                                                          | increased and higher than in VAT in obesity (M)                          | 37        |
|                        | increased in obesity (H)                                                                                                   | N/A                                                                      | 38        |
|                        | higher than in SAT in leans (H, M), reduced in obesity (H), increased early (3–4 days), but reduced late (8 wk) on HFD (M) | lower than in VAT in leans (H, M)                                        | 39        |
| ILC2                   | reside in leans (M)                                                                                                        | N/A                                                                      | 40        |
|                        | reside and higher than in SAT in leans (M), reduced in obesity (M)                                                         | reside in leans (H, M), reduced in obesity (H)                           | 41        |

Breg indicates regulatory B cells; H, human study; ILC, innate lymphoid cell; M, mouse study; MMe, metabolically activated; N/A, not available; NK, natural killer; SAT, subcutaneous adipose tissue; Th, T helper cells; Treg, regulatory T cells; Trem2, triggering receptor expressed on myeloid cells 2; and VAT, visceral adipose tissue

## References:

1. Weisberg SP, McCann D, Desai M, Rosenbaum M, Leibel RL, Ferrante AW Jr. Obesity is associated with macrophage accumulation in adipose tissue. *J Clin Invest*. 2003;112:1796-1808.
2. Xu H, Barnes GT, Yang Q, Tan G, Yang D, Chou CJ, Sole J, Nichols A, Ross JS, Tartaglia LA, Chen H. Chronic inflammation in fat plays a crucial role in the development of obesity-related insulin resistance. *J Clin Invest*. 2003;112:1821-1830.
3. Lumeng CN, Bodzin JL, Saltiel AR. Obesity induces a phenotypic switch in adipose tissue macrophage polarization. *J Clin Invest*. 2007;117:175-184.
4. Wu H, Perrard XD, Wang Q, Perrard JL, Polsani VR, Jones PH, Smith CW, Ballantyne CM. CD11c expression in adipose tissue and blood and its role in diet-induced obesity. *Arterioscler Thromb Vasc Biol*. 2010;30:186-192.
5. Kratz M, Coats BR, Hisert KB, Hagman D, Mutskov V, Peris E, Schoenfelt KQ, Kuzma JN, Larson I, Billing PS, Landerholm RW, Crouthamel M, Gozal D, Hwang S, Singh PK, Becker L. Metabolic dysfunction drives a mechanistically distinct proinflammatory phenotype in adipose tissue macrophages. *Cell Metab*. 2014;20:614-625.
6. Hill DA, Lim HW, Kim YH, Ho WY, Foong YH, Nelson VL, Nguyen HCB, Chegireddy K, Kim J, Habertheuer A, Vallabhajosyula P, Kambayashi T, Won KJ, Lazar MA. Distinct macrophage populations direct inflammatory versus physiological changes in adipose tissue. *Proc Natl Acad Sci U S A*. 2018;115:E5096-E5105.
7. Jaitin DA, Adlung L, Thaïss CA, Weiner A, Li B, Descamps H, Lundgren P, Bleriot C, Liu Z, Deczkowska A, Keren-Shaul H, David E, Zmora N, Eldar SM, Lubezky N, Shibolet O, Hill DA, Lazar MA, Colonna M, Ginhoux F, Shapiro H, Elinav E, Amit I. Lipid-associated macrophages control metabolic homeostasis in a Trem2-dependent manner. *Cell*. 2019;178:686-698 e614.
8. Wentworth JM, Naselli G, Brown WA, Doyle L, Phipson B, Smyth GK, Wabitsch M, O'Brien PE, Harrison LC. Pro-inflammatory CD11c+CD206+ adipose tissue macrophages are associated with insulin resistance in human obesity. *Diabetes*. 2010;59:1648-1656.
9. Wu H, Ghosh S, Perrard XD, Feng L, Garcia GE, Perrard JL, Sweeney JF, Peterson LE, Chan L, Smith CW, Ballantyne CM. T-cell accumulation and regulated on activation, normal T cell expressed and secreted upregulation in adipose tissue in obesity. *Circulation*. 2007;115:1029-1038.
10. Garcia-Rubio J, Leon J, Redruello-Romero A, Pavon E, Cozar A, Tamayo F, Caba-Molina M, Salmeron J, Carazo A. Cytometric analysis of adipose tissue reveals increments of adipocyte progenitor cells after weight loss induced by bariatric surgery. *Sci Rep*. 2018;8:15203.
11. Khan IM, Dai Perrard XY, Perrard JL, Mansoori A, Smith CW, Wu H, Ballantyne CM. Attenuated adipose tissue and skeletal muscle inflammation in obese mice with combined CD4+ and CD8+ T cell deficiency. *Atherosclerosis*. 2014;233:419-428.
12. Jiang E, Perrard XD, Yang D, Khan IM, Perrard JL, Smith CW, Ballantyne CM, Wu H. Essential role of CD11a in CD8+ T-cell accumulation and activation in adipose tissue. *Arterioscler Thromb Vasc Biol*. 2014;34:34-43.
13. McLaughlin T, Liu LF, Lamendola C, Shen L, Morton J, Rivas H, Winer D, Tolentino L, Choi O, Zhang H, Hui Yen Chng M, Engleman E. T-cell profile in adipose tissue is associated with insulin resistance and systemic inflammation in humans. *Arterioscler Thromb Vasc Biol*. 2014;34:2637-2643.
14. Nishimura S, Manabe I, Nagasaki M, Eto K, Yamashita H, Ohsugi M, Otsu M, Hara K, Ueki K, Sugiura S, Yoshimura K, Kadowaki T, Nagai R. CD8+ effector T cells contribute to macrophage recruitment and adipose tissue inflammation in obesity. *Nat Med*. 2009;15:914-920.
15. Winer S, Chan Y, Paltser G, Truong D, Tsui H, Bahrami J, Dorfman R, Wang Y, Zielenski J, Mastronardi F, Maezawa Y, Drucker DJ, Engleman E, Winer D, Dosch HM. Normalization of obesity-associated insulin resistance through immunotherapy. *Nat Med*. 2009;15:921-929.
16. Fabbrini E, Cella M, McCartney SA, Fuchs A, Abumrad NA, Pietka TA, Chen Z, Finck BN, Han DH, Magkos F, Conte C, Bradley D, Fraterrigo G, Eagon JC, Patterson BW, Colonna M, Klein S. Association between specific adipose tissue CD4+ T-cell populations and insulin resistance in obese individuals. *Gastroenterology*. 2013;145:366-374 e361-363.
17. Feuerer M, Herrero L, Cipolletta D, Naaz A, Wong J, Nayer A, Lee J, Goldfine AB, Benoist C, Shoelson S, Mathis D. Lean, but not obese, fat is enriched for a unique population of regulatory T cells that affect metabolic parameters. *Nat Med*. 2009;15:930-939.
18. Mehta P, Nuotio-Antar AM, Smith CW. gammadelta T cells promote inflammation and insulin resistance during high fat diet-induced obesity in mice. *J Leukoc Biol*. 2015;97:121-134.

19. Kohlgruber AC, Gal-Oz ST, LaMarche NM, Shimazaki M, Duquette D, Nguyen HN, Mina AI, Paras T, Tavakkoli A, von Andrian U, Banks AS, Shay T, Brenner MB, Lynch L.  $\gamma$ delta T cells producing interleukin-17A regulate adipose regulatory T cell homeostasis and thermogenesis. *Nat Immunol.* 2018;19:464-474.
20. Winer DA, Winer S, Shen L, Wadia PP, Yantha J, Paltser G, Tsui H, Wu P, Davidson MG, Alonso MN, Leong HX, Glassford A, Caimol M, Kenkel JA, Tedder TF, McLaughlin T, Miklos DB, Dosch HM, Engleman EG. B cells promote insulin resistance through modulation of T cells and production of pathogenic IgG antibodies. *Nat Med.* 2011;17:610-617.
21. McDonnell ME, Ganley-Leal LM, Mehta A, Bigornia SJ, Mott M, Rehman Q, Farb MG, Hess DT, Joseph L, Gokce N, Apovian CM. B lymphocytes in human subcutaneous adipose crown-like structures. *Obesity (Silver Spring).* 2012;20:1372-1378.
22. Ying W, Wollam J, Ofrecio JM, Bandyopadhyay G, El Ouarrat D, Lee YS, Oh DY, Li P, Osborn O, Olefsky JM. Adipose tissue B2 cells promote insulin resistance through leukotriene LTB4/LTB4R1 signaling. *J Clin Invest.* 2017;127:1019-1030.
23. Shen L, Chng MH, Alonso MN, Yuan R, Winer DA, Engleman EG. B-1a lymphocytes attenuate insulin resistance. *Diabetes.* 2015;64:593-603.
24. Harmon DB, Srikakulapu P, Kaplan JL, Oldham SN, McSkimming C, Garmey JC, Perry HM, Kirby JL, Prohaska TA, Gonen A, Hallowell P, Schirmer B, Tsimikas S, Taylor AM, Witztum JL, McNamara CA. Protective Role for B-1b B Cells and IgM in Obesity-Associated Inflammation, Glucose Intolerance, and Insulin Resistance. *Arterioscler Thromb Vasc Biol.* 2016;36:682-691.
25. Nishimura S, Manabe I, Takaki S, Nagasaki M, Otsu M, Yamashita H, Sugita J, Yoshimura K, Eto K, Komuro I, Kadowaki T, Nagai R. Adipose natural regulatory B cells negatively control adipose tissue inflammation. *Cell Metab.* 2013;18:759-766.
26. Elgazar-Carmon V, Rudich A, Hadad N, Levy R. Neutrophils transiently infiltrate intra-abdominal fat early in the course of high-fat feeding. *J Lipid Res.* 2008;49:1894-1903.
27. Talukdar S, Oh da Y, Bandyopadhyay G, Li D, Xu J, McNelis J, Lu M, Li P, Yan Q, Zhu Y, Ofrecio J, Lin M, Brenner MB, Olefsky JM. Neutrophils mediate insulin resistance in mice fed a high-fat diet through secreted elastase. *Nat Med.* 2012;18:1407-1412.
28. Wang Q, Xie Z, Zhang W, Zhou J, Wu Y, Zhang M, Zhu H, Zou MH. Myeloperoxidase deletion prevents high-fat diet-induced obesity and insulin resistance. *Diabetes.* 2014;63:4172-4185.
29. Hadad N, Burgazliev O, Elgazar-Carmon V, Solomonov Y, Wueest S, Item F, Konrad D, Rudich A, Levy R. Induction of cytosolic phospholipase  $\alpha$ 2 is required for adipose neutrophil infiltration and hepatic insulin resistance early in the course of high-fat feeding. *Diabetes.* 2013;62:3053-3063.
30. Wu D, Molofsky AB, Liang HE, Ricardo-Gonzalez RR, Jouihan HA, Bando JK, Chawla A, Locksley RM. Eosinophils sustain adipose alternatively activated macrophages associated with glucose homeostasis. *Science.* 2011;332:243-247.
31. Bolus WR, Gutierrez DA, Kennedy AJ, Anderson-Baucum EK, Hasty AH. CCR2 deficiency leads to increased eosinophils, alternative macrophage activation, and type 2 cytokine expression in adipose tissue. *J Leukoc Biol.* 2015;98:467-477.
32. Liu J, Divoux A, Sun J, Zhang J, Clement K, Glickman JN, Sukhova GK, Wolters PJ, Du J, Gorgun CZ, Doria A, Libby P, Blumberg RS, Kahn BB, Hotamisligil GS, Shi GP. Genetic deficiency and pharmacological stabilization of mast cells reduce diet-induced obesity and diabetes in mice. *Nat Med.* 2009;15:940-945.
33. Einwallner E, Kiefer FW, Di Caro G, Orthofer M, Witzeneder N, Hormann G, Itariu B, Zeyda M, Penninger JM, Stulnig TM, Esterbauer H, Todoric J. Mast cells are not associated with systemic insulin resistance. *Eur J Clin Invest.* 2016;46:911-919.
34. Gurung P, Moussa K, Adams-Huet B, Devaraj S, Jialal I. Increased mast cell abundance in adipose tissue of metabolic syndrome: relevance to the proinflammatory state and increased adipose tissue fibrosis. *Am J Physiol Endocrinol Metab.* 2019;316:E504-E509.
35. Lee BC, Kim MS, Pae M, Yamamoto Y, Eberle D, Shimada T, Kamei N, Park HS, Sasorith S, Woo JR, You J, Mosher W, Brady HJ, Shoelson SE, Lee J. Adipose Natural Killer Cells Regulate Adipose Tissue Macrophages to Promote Insulin Resistance in Obesity. *Cell Metab.* 2016;23:685-698.
36. Wensveen FM, Jelencic V, Valentic S, Sestan M, Wensveen TT, Theurich S, Glasner A, Mendrila D, Stimac D, Wunderlich FT, Bruning JC, Mandelboim O, Polic B. NK cells link obesity-induced adipose stress to inflammation and insulin resistance. *Nat Immunol.* 2015;16:376-385.
37. O'Sullivan TE, Rapp M, Fan X, Weizman OE, Bhardwaj P, Adams NM, Walzer T, Dannenberg AJ, Sun JC. Adipose-Resident Group 1 Innate Lymphoid Cells Promote Obesity-Associated Insulin Resistance. *Immunity.* 2016;45:428-441.

38. Wang H, Shen L, Sun X, Liu F, Feng W, Jiang C, Chu X, Ye X, Jiang C, Wang Y, Zhang P, Zang M, Zhu D, Bi Y. Adipose group 1 innate lymphoid cells promote adipose tissue fibrosis and diabetes in obesity. *Nat Commun.* 2019;10:3254.
39. Boulenouar S, Michelet X, Duquette D, Alvarez D, Hogan AE, Dold C, O'Connor D, Stutte S, Tavakkoli A, Winters D, Exley MA, O'Shea D, Brenner MB, von Andrian U, Lynch L. Adipose Type One Innate Lymphoid Cells Regulate Macrophage Homeostasis through Targeted Cytotoxicity. *Immunity.* 2017;46:273-286.
40. Molofsky AB, Nussbaum JC, Liang HE, Van Dyken SJ, Cheng LE, Mohapatra A, Chawla A, Locksley RM. Innate lymphoid type 2 cells sustain visceral adipose tissue eosinophils and alternatively activated macrophages. *J Exp Med.* 2013;210:535-549.
41. Brestoff JR, Kim BS, Saenz SA, Stine RR, Monticelli LA, Sonnenberg GF, Thome JJ, Farber DL, Lutfy K, Seale P, Artis D. Group 2 innate lymphoid cells promote beiging of white adipose tissue and limit obesity. *Nature.* 2015;519:242-246.
